# Supplementary material for: Transcriptome Analysis of Cells Exposed to Actinomycin D and Nutlin-3a Reveals New Candidate p53-Target Genes and Indicates That CHIR-98014 Is an Important Inhibitor of p53 Activity
Source: MDPI journal article supplement (doi:10.3390/ijms222011072), 2021-10-14
Supplement: s1 [file s1]

Table S1. The sequences of RT-PCR primers.

| Gene               | Sequence 5'→3'                                                     | Company                                      |
|--------------------|--------------------------------------------------------------------|----------------------------------------------|
| <b>CASP1</b>       | TCG CTT TCT GCT CTT CCA CA and<br>TCC ACA TCA CAG GAA CAG GC       | Genomed, Warsaw, Poland                      |
| <b>STING</b>       | TAC ATC GGA TAT CTG CGG CT and<br>TGG GGC AGT TTA TCC AGG AA       | Genomed, Warsaw, Poland                      |
| <b>H19</b>         | AAT CGG CTC TGG AAG GTG AAG and<br>GCT GCT GTT CCG ATG GTG TC      | Genomed, Warsaw, Poland                      |
| <b>P21(CDKN1A)</b> | CTG CCT CCT CCC AAC TCA and<br>CCC GTG AGC GAT GGA ACT             | BioTeZ, BerlinBuch,<br>Germany               |
| <b>BBC3</b>        | GGG TGA GAC CCA GTA AGG AT and<br>AGC TTT CCA TTC CGT TTC TT       | RealTimePrimers.com, Elkins<br>Park, PA, USA |
| <b>DRAM1</b>       | AGA CTC CAT CTT TTC ACC CAA A and<br>GCT CTT CAC CTT TCA AGC CTA A | BioTeZ, BerlinBuch,<br>Germany               |
| <b>APOE</b>        | AAGCGA CCCAGT GCCAGT TC<br>and<br>GTCCTT CCCCAG GAGCCG AC          | Genomed, Warsaw, Poland                      |
| <b>BLNK</b>        | TCTGCTGAAGAGGCATTGCAC and<br>GTTTGGAAATCATGGCCAGAGC                | Genomed, Warsaw, Poland                      |
| <b>CRYAB</b>       | GCACTT CTCCCC AGAGGA AC<br>and<br>CCATTC ACAGTG AGGACC CC          | Genomed, Warsaw, Poland                      |
| <b>CCNG2</b>       | TTGATT GAGGCT ACCCCG GA<br>and AGAACA GACTCC AATGCA AGACA          | Genomed, Warsaw, Poland                      |
| <b>FAS</b>         | TGGGGA TGAACC AGACTG CG<br>and<br>CTGGGT CCGGGT GCAGTT TA          | Genomed, Warsaw, Poland                      |
| <b>PMAIP</b>       | CCGAAG ATTACC GCTGGC CT<br>and<br>ACAATG TGCTGA GTTGGC ACTG        | Genomed, Warsaw, Poland                      |
| <b>GDF15</b>       | TCAAGG TCGTGG GACGTG AC<br>and<br>TGCGGA CGAAGA TTCTGC CA          | Genomed, Warsaw, Poland                      |
| <b>BCL2L15</b>     | TGCCAC AGGATG CAGGAA GT<br>and<br>AGGTCC ACAAGT GGTGTG TGA         | Genomed, Warsaw, Poland                      |
| <b>IRF1</b>        | AAAGTC GAAGTC CAGCCG AG<br>and<br>TGTTGT AGCTGG AGTCAG GG          | Genomed, Warsaw, Poland                      |
| <b>IFIT2</b>       | AGGAAGGGTGGACACGGTTA and<br>TGCCTCAGAGGGTCAATGGC                   | Genomed, Warsaw, Poland                      |
